# Supplementary material for: Single molecule molecular inversion probes for targeted, high-accuracy detection of low-frequency variation
Source: HighWire-hosted journal article supplement (doi:10.1101/gr.147686.112), 2013-02-04
Supplement: Supplemental_Material.docx [file Supplemental_Material.docx]

**Supplemental Materials for “Single molecule molecular inversion probes for targeted, high accuracy detection of low frequency variation”**

Supplemental Fig. S1. Mapping and on-target rates of HiSeq data. 2

Supplemental Fig. S2. Number of fr-reads per smc-read by sample type. 4

Supplemental Fig. S3. Estimation of variant frequency in HapMap samples. 5

Supplemental Fig. S4. Substitution rate as a function of minimum base-call quality score and expected and observed gap-fill nucleotides. 6

Supplemental Fig. S5. Substitution rate distributions as a function of expected and observed gap-fill nucleotide. 8

Supplemental Fig. S6. Somatic mutations in clinical samples. 11

Supplemental Fig. S7. Alternate allele frequencies of somatic and germline variants in clinical samples. 13

Supplemental Fig. S8. Smc-read base-call quality score as a function of TDRG size. 15

Supplemental Fig. S9. Smc-read base-call quality score as a function of TDRG size. 16

Supplemental Fig. S10. Mapping and on-target rates from MiSeq rapid workflow assay. 17

Supplemental Fig. S11. Downsampling effect on mean coverage. 18

Supplemental Table S1. Targeted genes. 19

Supplemental Table S2. Description of clinical samples. 20

Supplemental Table S3. Substitution rates for guanine to adenine. 22

Supplemental Table S4. Detection of previously ascertained substitution mutations in clinical samples. 23

Supplemental Table S5. Detection of previously ascertained insertion and deletion mutations in clinical samples. 24

Supplemental Table S6. Rapid workflow timetable. 25

Supplemental Table S7. Performance of rapid library construction and sequencing workflow. 26

Supplemental Table S8. Effect of down-sampling on substitution error rate. 27

Supplemental Table S9. Oligo sequences. 28

Supplemental Note S1. Two layers of indexing in the smMIP strategy. 30

Supplemental Note S2. Variation in fraction of aligning reads. 31

Supplemental Note S3. Coverage distributions. 32

Supplemental Note S4. Rapid workflow characterization. 33

Supplemental Fig. S1. Mapping and on-target rates of HiSeq data.

The total number of fr-reads, mapping and on-target fr-reads (“mapped_and_on”) as determined by expected read start position and orientation with respect to the reference, mapping but off-target fr-reads (“mapped_but_off”), and unmapped fr-reads (“not_mapped”) are shown for the eight HapMap cell line samples (**a**) and the 45 successfully captured clinical samples (**b**).

**Supplemental Fig. S2. Number of fr-reads per smc-read by sample type.**

Distributions of mean number of fr-reads per smc-read for samples by type. Most samples are characterized by relatively few fr-reads per smc-read, suggesting efficient capture and high library complexity, while a minority of the FFPE clinical samples are characterized by a higher number of fr-reads per smc-read, suggesting reduced capture efficiency leading to decreased library complexity.

**Supplemental Fig. S3. Estimation of variant frequency in HapMap samples.**

Distributions of the ratio of observed to expected variant frequency across log-transformed expected variant frequency bins for actual smc-read base-calls compared to Poisson sampling using the number of observations and the observed frequency. Restricted to positions with coverage at least 100×. The comparable distributions show that deviation from expectation, especially at low frequencies, is largely explained by sampling statistics.

Supplemental Fig. S4. Substitution rate as a function of minimum base-call quality score and expected and observed gap-fill nucleotides.

For putative homozygous reference positions, plotted is the substitution error rate as a function of observed and expected nucleotide in the gap-fill for all base-calls in fr-reads (a) and smc-reads (b) with at least a given quality score. We note that an smc-read call must have multiple independent fr-reads contributing to achieve a quality of 60, as an fr-read call with Q60 (due to the merging process) while be rescaled to 59 according to the likelihood ratio quality estimation process and subsequent integer casting.

Supplemental Fig. S5. Substitution rate distributions as a function of expected and observed gap-fill nucleotide.

All rates are shown for a given expected gap-fill mono- or dinucleotide, that is the complementary nucleotide(s) to the nucleotide(s) present in the target genomic DNA, considering only ≥Q41 fr-read base-calls and Q60 smc-read base-calls at putative homozygous positions based on GATK calls. (**a**) Mononucleotide substitution rates for fr-reads and smc-reads, and HapMap and clinical samples (both fresh and FFPE), for all twelve possible substitutions. (**b**) Substitution rate of cytosine to adenine for all possible gap-fill dinucleotides involving cytosine as one of the two nucleotides, for fr-reads and smc-reads and for HapMap and clinical samples. (**c**) Substitution rate of guanine to adenine for all possible gap-fill dinucleotides involving guanine as one of two nucleotides, for fr-reads and smc-reads and for HapMap and clinical samples. (**d**) Substitution rate of cytosine to thymine for all possible gap-fill dinucleotides involving cytosine as one of two nucleotides, for fr-reads and smc-reads and for HapMap and clinical samples.

Supplemental Fig. S6. Somatic mutations in clinical samples.

(a) Number of coding, non-synonymous point or indel mutations in targeted genes detected in clinical samples (numerical sample ID listed after tissue type) at intra-sample allele frequency ≥~10%, for variants that are candidate somatic events (*i.e.* site not variable in the exomes of 5400 individuals), and as a function of presence in the COSMIC database (red: in COSMIC; blue: not in COSMIC). (b) Number of samples with at least one mutation in a given gene as a function of COSMIC database status and cancer type (AML: acute myeloid leukemia; GIST: Gastrointestinal stromal tumor; MPD: myeloproliferative disorder).

Supplemental Fig. S7. Alternate allele frequencies of somatic and germline variants in clinical samples.

(a) Alternate allele frequency for candidate somatic mutations (called by GATK) in clinical samples (numerical sample ID listed after tissue type) as a function of COSMIC database status and with point size scaled to coverage of that site in that sample. (b) Alternate allele frequency for candidate germline variants (based on site having been called as variant in at least one of 5400 exomes) in two unmixed HapMap (red) and 45 clinical cancer (blue) samples with point size scaled to coverage.

Supplemental Fig. S8. Smc-read base-call quality score as a function of TDRG size.

Plotted is the number of smc-read base-calls, across all samples and for smc-reads aligning without insertion or deletion edits, as a function of the number of fr-reads in the TDRG associated with that smc-read and the estimated quality score of the base-call at chr7:140453136 (*BRAF* p.V600) (**a**) and chr12:25398284 (*KRAS* p.G12) (**b**). Smc-read base-call quality score is a measure of TDRG clonality, as positions with discordant calls will be assigned lower quality scores.

Supplemental Fig. S9. Smc-read base-call quality score as a function of TDRG size.

FDR (top panels) and sensitivity (bottom panels) for sub-clonal variation is plotted for the six HapMap synthetic mixtures (expected variant frequency shown above panels) as a function of adjusted p-value cutoff for fr-reads (red) and smc-reads (blue). This analysis was restricted to positions in coding sequence that were adequately genotyped in both unmixed HapMap samples and for which there was no substantial (binomial p<10-10) sub-clonality in the predominant HapMap sample, and only to variants above 0.1% frequency. Expected sub-clonal variant frequencies are listed at the top of each panel.

Supplemental Fig. S10. Mapping and on-target rates from MiSeq rapid workflow assay.

The total number of fr-reads, mapping and on-target fr-reads (“mapped_and_on”) as determined by expected read start position and orientation with respect to the reference, mapping but off-target fr-reads (“mapped_but_off”), and unmapped fr-reads (“not_mapped”) are shown for the eight clinical samples subjected to the “low-coverage/rapid workflow” smMIP implementation.

Supplemental Fig. S11. Downsampling effect on mean coverage.

Mean fold coverage across 8 HapMap (red) and 45 clinical (blue) samples for various fractions of overall raw HiSeq data (3.2x108 paired-end reads or ~64.8Gb of sequence) ranging from 1% to 50%.

Supplemental Table S1. Targeted genes.

| **Gene** | **# of coding bases** | **# of discrete intervals** | **# of targeted coding bases** | **# of smMIPs** |
| --- | --- | --- | --- | --- |
| *ABL1* | 3529 | 12 | 3482 | 47 |
| *AKT1* | 1443 | 13 | 1443 | 29 |
| *AKT2* | 1446 | 13 | 1446 | 28 |
| *APC* | 8697 | 16 | 8697 | 105 |
| *BRAF* | 2301 | 18 | 2301 | 41 |
| *CDK4* | 912 | 7 | 912 | 15 |
| *CDKN2A* | 912 | 5 | 912 | 16 |
| *CSF1R* | 2919 | 21 | 2919 | 47 |
| *CTNNB1* | 2346 | 14 | 2346 | 35 |
| *EGFR* | 3889 | 30 | 3889 | 67 |
| *ERBB2* | 3768 | 27 | 3768 | 63 |
| *FGFR1* | 2635 | 19 | 2635 | 45 |
| *FGFR2* | 2710 | 20 | 2640 | 48 |
| *FGFR3* | 2572 | 18 | 2572 | 43 |
| *FLT3* | 2982 | 24 | 2982 | 50 |
| *HRAS* | 633 | 5 | 633 | 12 |
| *JAK2* | 3399 | 23 | 3399 | 53 |
| *JAK3* | 3375 | 23 | 3375 | 56 |
| *KIT* | 2931 | 21 | 2931 | 47 |
| *KRAS* | 687 | 5 | 687 | 13 |
| *MET* | 4227 | 20 | 4227 | 61 |
| *MLH1* | 2271 | 19 | 1872 | 44 |
| *MYC* | 1365 | 3 | 1365 | 17 |
| *NRAS* | 570 | 4 | 570 | 8 |
| *PDGFRA* | 3270 | 22 | 3270 | 49 |
| *PIK3CA* | 3207 | 20 | 3207 | 51 |
| *PTEN* | 1212 | 9 | 1212 | 22 |
| *RB1* | 2787 | 27 | 2787 | 58 |
| *RET* | 3377 | 20 | 3377 | 52 |
| *SRC* | 1611 | 11 | 1611 | 27 |
| *STK11* | 1302 | 9 | 1302 | 23 |
| *TP53* | 1263 | 12 | 1215 | 31 |
| *VHL* | 642 | 3 | 400 | 9 |
| Total | 81190 | 513 | 80384 | 1312 |

Gene name, size, number of discrete genomic intervals, number of coding bases for which probes were successfully designed, and number of probes for targeted capture of the coding sequence of 33 cancer-related genes harboring clinically actionable mutations.

Supplemental Table S2. Description of clinical samples.

| **Sample ID** | **Estimated % tumor nuclei** | **Diagnosis** | **Site** | **Tumor category** | **Collection date** | **DNA isolation date** |
| --- | --- | --- | --- | --- | --- | --- |
| 1 | 10 | Rectal adenocarcinoma | Liver | Colon | 7/08 | 6/09 |
| 2* | 1 | Colorectal adenocarcinoma | Colon | Colon | NA | 12/11 |
| 3 | 30 | Colorectal adenocarcinoma | Lymph node | Colon | 6/10 | 1/11 |
| 4 | 60 | Ovarian adenocarcinoma | Ovary | Ovarian | 5/09 | NA |
| 5 | 50 | Rectal adenocarcinoma | Rectum | Colon | 12/10 | 1/11 |
| 6 | 30 | Colorectal adenocarcinoma | Colon | Colon | 3/10 | 1/11 |
| 7 | 40 | Metastatic papillary lung adenocarcinoma | Lymph node | Lung | 9/10 | 10/10 |
| 8 | 100 | Lung adenocarcinoma | Brain | Lung | 4/11 | 4/11 |
| 9 | 80 | Melanoma | Lymph node | Melanoma | 5/10 | 2/11 |
| 10 | 50 | Colorectal adenocarcinoma | Cecum | Colon | 3/11 | 6/11 |
| 11 | 50 | Metastatic colorectal adenocarcinoma | Liver | Colon | 2/10 | 12/11 |
| 12 | 60 | Colorectal adenocarcinoma | Colon | Colon | 8/09 | 1/11 |
| 13 | 50 | Colorectal adenocarcinoma | Terminal ileum | Colon | 9/10 | 11/10 |
| 14 | 40 | Colorectal adenocarcinoma | Colon | Colon | 6/10 | 9/10 |
| 15* | 60 | Colorectal adenocarcinoma | Sigmoid rectum | Colon | 4/10 | 12/11 |
| 16 | NA | Melanoma | Thigh | Melanoma | 3/10 | 4/10 |
| 17 | 70 | Melanoma | Axillary mass | Melanoma | 6/11 | 11/11 |
| 18 | 90 | Metastatic melanoma | Lymph node | Melanoma | 10/08 | 3/11 |
| 19 | 45 | Melanoma | Brain | Melanoma | 4/08 | 11/11 |
| 20 | 50 | Colorectal adenocarcinoma | Colon | Colon | 10/09 | 12/11 |
| 21 | 50 | Non-small cell lung cancer | Lung | Lung | 12/09 | 7/10 |
| 22 | NA | Non-small cell lung cancer | Pleural effusion | Lung | 4/10 | 5/10 |
| 23 | 50 | Lung adenocarcinoma | Lung | Lung | 2/07 | 11/10 |
| 24 | 80 | Lung adenocarcinoma | Lung | Lung | NA | 9/10 |
| 25 | 80 | Gastrointestinal stromal tumor | NA | GIST | NA | NA |
| 26 | 75 | Gastrointestinal stromal tumor | Stomach | GIST | 2/11 | 11/11 |
| 27 | 50 | Gastrointestinal stromal tumor | Stomach | GIST | 5/11 | 5/11 |
| 28 | NA | Gastrointestinal stromal tumor | Ileum | GIST | 5/11 | 5/11 |
| 29** | NA | Polycythemia vera | Peripheral blood | MPD | 11/05 | 11/05 |
| 30 | NA | Metastatic urothelial carcinoma | Lung | Bladder | 9/04 | 5/10 |
| 31 | NA | Colorectal adenocarcinoma | Sigmoid colon | Colon | 3/11 | 4/11 |
| 32 | NA | Colorectal adenocarcinoma | Sigmoid rectum | Colon | 8/09 | 4/11 |
| 33 | 70 | Rectal adenocarcinoma | Liver | Colon | 2/11 | 7/11 |
| 34 | 20 | Colorectal adenocarcinoma | Lung | Colon | 1/11 | 2/11 |
| 35 | 50 | Melanoma | Nasal cavity | Melanoma | NA | 8/10 |
| 36 | 70 | Metastatic colorectal adenocarcinoma | Lung | Colon | 9/09 | 7/10 |
| 37 | 75 | Metastatic lung adenocarcinoma | Small intestine | Lung | 8/10 | 8/10 |
| 38 | 50 | Metastatic lung adenocarcinoma | Cerebellum | Lung | 10/11 | 11/11 |
| 39 | 30 | Metastatic non-small cell lung cancer | Lymph node | Lung | 10/10 | 10/10 |
| 40 | 50 | Lung adenocarcinoma | Lung | Lung | 11/10 | 11/10 |
| 41 | 50 | Lung adenocarcinoma | Lymph node | Lung | 3/10 | 8/10 |
| 43 | 40 | Melanoma | Skin | Melanoma | 7/10 | 10/11 |
| 44 | 10 | Metastatic colorectal adenocarcinoma | Liver | Colon | 7/08 | 12/11 |
| 45** | NA | Polycythemia vera | Peripheral blood | MPD | 11/05 | 11/05 |
| 47** | NA | Acute myeloid leukemia | Bone marrow | AML | 4/10 | 4/10 |
| 48** | NA | Acute myeloid leukemia | Peripheral blood | AML | 11/08 | 12/08 |
| 49** | NA | Polycythemia vera | Peripheral blood | MPD | 12/05 | 12/05 |

Numerical sample ID, histologically estimated percent tumor nuclei, clinical diagnosis, biopsy/collection site, tumor category (MPD: myeloproliferative disorder; GIST: gastrointestinal stromal tumor; AML: acute myeloid leukemia), tissue collection date (month/year), and DNA isolation date are shown for samples collected during routine clinical practice. Specimens were FFPE tissue unless otherwise indicated. NA: not applicable or information not available. *Failed capture, excluded from subsequent analysis. **Not FFPE tissue.

Supplemental Table S3. Substitution rates for guanine to adenine.

|  | | **fr-reads** | | **smc-reads** | | **Fold-reduction in sub. rate** |
| --- | --- | --- | --- | --- | --- | --- |
| **Calls** | **Sub. rate** | **Calls** | **Sub. rate** |
| **HapMap cell lines** | No CG>CA | 1.39E+09 | 1.93E-04 | 6.19E+08 | 4.24E-05 | 4.55 |
| Only CG>CA | 4.90E+07 | 6.50E-04 | 2.38E+07 | 3.77E-04 | 1.72 |
| **Clinical (fresh)** | No CG>CA | 3.30E+08 | 2.04E-04 | 9.41E+07 | 4.94E-05 | 4.12 |
| Only CG>CA | 1.29E+07 | 7.13E-04 | 4.02E+06 | 4.32E-04 | 1.65 |
| **Clinical (FFPE)** | No CG>CA | 2.84E+09 | 2.84E-04 | 1.05E+09 | 1.33E-04 | 2.13 |
| Only CG>CA | 1.24E+08 | 1.29E-03 | 5.07E+07 | 9.49E-04 | 1.36 |

Total number of calls, substitution rates, and the fold-reduction in substitution rate comparing smc-reads to fr-reads for very high-confidence (≥Q41) base-calls from fr-reads and smc-reads (Q60), shown for the incorporation of dA into the probe when dG was expected, as a function of dinucleotide context. Although the substitution rate for CG>CA in smc-reads is higher by ~8-fold compared to all other G>A substitutions, CG is an infrequent dinucleotide, and the substitution rate of G>A in the absence of CG>CA remains elevated, suggesting that deamination of 5mC is not the only factor causing high rates of G>A substitution, and that deamination of C to U may also be playing a substantial role.

Supplemental Table S4. Detection of previously ascertained substitution mutations in clinical samples.

| **Sample #** | **Cancer type** | **Gene** | **Chr.** | **Position** | **Ref. allele** | **Sample genotype** | **# of ref. allele obs.** | **# of alt. allele obs.** | **Alt. allele fraction** | **Mut. in protein** |
| --- | --- | --- | --- | --- | --- | --- | --- | --- | --- | --- |
| 9 | Melanoma | *BRAF* | 7 | 140453136 | A | A/T | 2118 | 594 | 0.22 | p.V600E |
| 16 | Melanoma | *BRAF* | 7 | 140453136 | A | A/T | 1842 | 1250 | 0.40 | p.V600E |
| 17 | Melanoma | *BRAF* | 7 | 140453136 | A | A/T | 358 | 698 | 0.66 | p.V600E |
| 18 | Melanoma | *BRAF* | 7 | 140453136 | A | A/T | 906 | 1546 | 0.63 | p.V600K* |
| 18 | Melanoma | *BRAF* | 7 | 140453137 | C | C/T | 905 | 1548 | 0.63 | p.V600K* |
| 19 | Melanoma | *BRAF* | 7 | 140453136 | A | A/T | 2874 | 1843 | 0.39 | p.V600K* |
| 19 | Melanoma | *BRAF* | 7 | 140453137 | C | C/T | 2875 | 1844 | 0.39 | p.V600K* |
| 20 | Colon | *BRAF* | 7 | 140453136 | A | A/T | 2502 | 1596 | 0.39 | p.V600E |
| 21 | Lung | *EGFR* | 7 | 55259515 | T | G/T | 386 | 319 | 0.45 | p.L858R |
| 22 | Lung | *EGFR* | 7 | 55259515 | T | G/T | 1659 | 793 | 0.32 | p.L858R |
| 29 | MPD | *JAK2* | 9 | 5073770 | G | G/T | 1443 | 865 | 0.37 | p.V617F |
| 45 | MPD | *JAK2* | 9 | 5073770 | G | G/T | 643 | 6234 | 0.91 | p.V617F |
| 49 | MPD | *JAK2* | 9 | 5073770 | G | G/T | 3462 | 597 | 0.15 | p.V617F |
| 1 | Colon | *KRAS* | 12 | 25398285 | C | C/A | 468 | 81 | 0.15 | p.G12C |
| 3 | Colon | *KRAS* | 12 | 25398284 | C | C/T | 663 | 103 | 0.13 | p.G12D |
| 8 | Lung | *KRAS* | 12 | 25398285 | C | C/A | 478 | 614 | 0.56 | p.G12C |
| 11 | Colon | *KRAS* | 12 | 25398284 | C | C/T | 141 | 100 | 0.41 | p.G12D |
| 12 | Colon | *KRAS* | 12 | 25398281 | C | C/T | 602 | 285 | 0.32 | p.G13D |
| 13 | Colon | *KRAS* | 12 | 25398284 | C | C/A | 593 | 319 | 0.35 | p.G12V |
| 14 | Colon | *KRAS* | 12 | 25398281 | C | C/T | 801 | 435 | 0.35 | p.G13D |
| 37 | Lung | *KRAS* | 12 | 25398284 | C | C/A | 624 | 1684 | 0.73 | p.G12V |
| 44 | Colon | *KRAS* | 12 | 25398285 | C | C/A | 480 | 109 | 0.19 | p.G12C |
| 43 | Melanoma | *NRAS* | 1 | 115256529 | T | T/C | 225 | 65 | 0.22 | p.Q61R |
| 26 | GIST | *PDGFRA* | 4 | 55152093 | A | A/T | 859 | 334 | 0.28 | p.D842V |
| 27 | GIST | *PDGFRA* | 4 | 55152093 | A | A/T | 1451 | 475 | 0.25 | p.D842V |

Numerical sample ID, cancer type, gene name, chromosome, position, reference allele, sample genotype, number of smc-read reference allele calls, number of smc-read alternate allele calls, relative fraction of alternate allele calls, and resulting protein change are shown for mutations at clinically informative sites for which these samples were previously genotyped. Two *KRAS* mutations in Lung samples that were not previously genotyped at that site but were subsequently confirmed are also shown (*KRAS* mutations in samples 8 and 37). *p.V600K is caused by adjacent substitutions at positions chr7:140453136 and chr7:140453137.

Supplemental Table S5. Detection of previously ascertained insertion and deletion mutations in clinical samples.

| **Sample #** | 23 | 24 | 28 | 25 |
| --- | --- | --- | --- | --- |
| **Cancer type** | Lung | Lung | GIST | GIST |
| **Gene** | *EGFR* | *EGFR* | *KIT* | *KIT* |
| **Chromosome** | 7 | 7 | 4 | 4 |
| **Position** | 55242467 | 55242469 | 55593600 | 55593646 |
| **Exon** | 19 | 19 | 11 | 11 |
| **Reference allele** | AATTAAGAGAAGCAAC | TTAAGAGAAGCAACATCTC | CAGTGGAAGGTTGTTG | T |
| **Sample genotype** | AATTAAGAGAAGCAAC  /  A | TTAAGAGAAGCAACATCTC  /  T | CAGTGGAAGGTTGTTG  /  C | T  /  TAGACCC |
| **Reference allele counts** | 358 | 817 | 1143 | 1033 |
| **Alternate allele counts** | 155 | 363 | 1186 | 766 |
| **Alternate allele fraction** | 0.30 | 0.31 | 0.51 | 0.43 |
| **Reference amino acids** | LREAT | LREATSP | WKVVE | - |
| **Reference amino acid positions** | 747-751 | 747-753 | 557-561 | after 571 |
| **Alternate amino acids** | - | S | - | DP |

Numerical sample ID, cancer type, gene name, chromosome, position, exon number, reference allele, sample genotype, number of smc-read reference allele calls, number of smc-read alternate allele calls, relative fraction of alternate allele calls, reference amino acids, positions of reference amino acids, and amino acids in place of reference amino acids caused by mutation. and resulting protein change are shown for mutations at clinically informative sites for which these samples were previously genotyped. Two larger insertions in *FLT3* (67 and 104 bp, but of unknown exact position) were not detected in the smMIP data using the analysis strategy currently employed.

Supplemental Table S6. Rapid workflow timetable.

| **Step nbr.** | **Step description** | **Time (min)** | **Time (hrs)** | **Total time (mins)** | **Total time (hrs)** | **Start day** | **End day** | **Start time** | **End time** |
| --- | --- | --- | --- | --- | --- | --- | --- | --- | --- |
| 1 | Isolate genomic DNA | 240 | 4.00 | 240 | 4.00 | 1 | 1 | 9:00 AM | 1:00 PM |
| 2 | Hybridization, Gap-fill, Ligation* | 300 | 5.00 | 540 | 9.00 | 1 | 1 | 1:00 PM | 6:00 PM |
| 3 | Wait overnight | 900 | 15.00 | 1440 | 24.00 | 1 | 2 | 6:00 PM | 9:00 AM |
| 4 | Exonuclease | 65 | 1.08 | 1505 | 25.08 | 2 | 2 | 9:00 AM | 10:05 AM |
| 5 | PCR | 120 | 2.00 | 1625 | 27.08 | 2 | 2 | 10:05 AM | 12:05 PM |
| 6 | SPRI purification (1.8x) | 20 | 0.33 | 1645 | 27.42 | 2 | 2 | 12:05 PM | 12:25 PM |
| 7 | SPRI purification (0.8x) | 20 | 0.33 | 1665 | 27.75 | 2 | 2 | 12:25 PM | 12:45 PM |
| 8 | Gel | 60 | 1.00 | 1725 | 28.75 | 2 | 2 | 12:45 PM | 1:45 PM |
| 9 | Pooling and quantification | 20 | 0.33 | 1745 | 29.08 | 2 | 2 | 1:45 PM | 2:05 PM |
| 10 | MiSeq | 1680 | 28.00 | 3425 | 57.08 | 2 | 3 | 2:05 PM | 6:05 PM |
| 11 | Analysis** | 360 | 6.00 | 3785 | 63.08 | 3 | 3 | 6:05 PM | 12:05 AM |

Estimated practical timetable (assuming ~8 hour workday) for rapid workflow, including step number, description, time for each step, cumulative time, day of start and finish, and wall clock time of start and finish for each step. *No sample manipulation is required at the end of step 2. **As analysis process is automated, we assumed it could be performed following the end of the MiSeq run (but not during a routine work day).

Supplemental Table S7. Performance of rapid library construction and sequencing workflow.

| **Sample number** | **Cancer type** | **Fraction of targeted bases covered** | **Fraction of high-coverage sites covered** | **Concordance with high-coverage data** | **Clinically informative mutation** | **Detected clinically informative mutation?** | **Ref. allele / alt. allele counts** |
| --- | --- | --- | --- | --- | --- | --- | --- |
| 13 | Colon | 0.96 | 0.98 | 100% (77378/77378) | *KRAS* p.G12V | Yes | 92/56 |
| 18 | Melanoma | 0.85 | 0.92 | 100% (68610/68610) | *BRAF* p.V600K | Yes | 119/229 |
| 19 | Melanoma | 0.97 | 0.99 | 100% (77833/77833) | *BRAF* p.V600K | Yes | 412/256 |
| 34 | Colon | 0.96 | 0.99 | 100% (77055/77055) | None | NA | NA |
| 37 | Lung | 0.97 | 0.99 | 100% (77645/77645) | *KRAS* p.G12V | Yes | 156/418 |
| 38 | Lung | 0.97 | 0.99 | 100% (78015/78015) | None | NA | NA |
| 41 | Lung | 0.91 | 0.95 | 100% (73427/73427) | None | NA | NA |
| 43 | Melanoma | 0.94 | 0.97 | 100% (75823/75823) | *NRAS* p.Q61R | Yes | 27/6 |

Numerical sample ID, cancer type, fraction of targeted bases that were successfully genotyped in MiSeq data (requiring at least 10× coverage), fraction of successfully genotyped sites in HiSeq data (requiring coverage at least 30×) that were successfully genotyped in MiSeq data, percent concordance with high-coverage data and number of sites, clinically informative mutation, whether clinically informative mutation was accurately genotyped, and allele counts of clinically informative mutation for eight clinical samples subjected to rapid benchtop sequencing workflow.

Supplemental Table S8. Effect of down-sampling on substitution error rate.

|  | **Fraction of data** | **Raw sequence data** | **fr-reads** | | **smc-reads** | | **Fold-reduction in sub. rate** |
| --- | --- | --- | --- | --- | --- | --- | --- |
| **Calls** | **Sub. rate** | **Calls** | **Sub. rate** |
| **HapMap cell lines** | 0.01 | 1.30e+09 | 1.02E+08 | 1.08E-04 | 1.90E+01 | 1.03E-05 | 10.46 |
| 0.05 | 6.48e+09 | 5.13E+08 | 1.09E-04 | 3.53E+02 | 8.31E-06 | 13.06 |
| 0.1 | 1.30e+10 | 1.03E+09 | 1.08E-04 | 1.32E+03 | 8.50E-06 | 12.74 |
| 0.25 | 3.24e+10 | 2.57E+09 | 1.08E-04 | 6.18E+03 | 8.36E-06 | 12.89 |
| 0.5 | 6.48e+10 | 5.15E+09 | 1.08E-04 | 1.72E+04 | 8.45E-06 | 12.80 |
| **Clinical (fresh)** | 0.01 | 1.30e+09 | 2.31E+07 | 1.12E-04 | 1.00E+00 | 1.01E-05 | 11.08 |
| 0.05 | 6.48e+09 | 1.16E+08 | 1.11E-04 | 2.50E+01 | 1.02E-05 | 10.84 |
| 0.1 | 1.30e+10 | 2.33E+08 | 1.10E-04 | 1.04E+02 | 1.08E-05 | 10.15 |
| 0.25 | 3.24e+10 | 5.84E+08 | 1.09E-04 | 5.70E+02 | 1.01E-05 | 10.74 |
| 0.5 | 6.48e+10 | 1.17E+09 | 1.09E-04 | 1.94E+03 | 9.58E-06 | 11.36 |
| **Clinical (FFPE)** | 0.01 | 1.30e+09 | 1.93E+08 | 1.28E-04 | 3.58E+02 | 3.08E-05 | 4.15 |
| 0.05 | 6.48e+09 | 9.71E+08 | 1.29E-04 | 5.68E+03 | 2.93E-05 | 4.40 |
| 0.1 | 1.30e+10 | 1.94E+09 | 1.29E-04 | 1.63E+04 | 2.93E-05 | 4.38 |
| 0.25 | 3.24e+10 | 4.87E+09 | 1.29E-04 | 5.53E+04 | 2.95E-05 | 4.37 |
| 0.5 | 6.48e+10 | 9.74E+09 | 1.29E-04 | 1.15E+05 | 2.89E-05 | 4.46 |

Fraction of fr-reads (prior to fr-read formation) used, number of base-calls, substitution rate and fold-reduction in substitution rate comparing smMIP Q60 calls to fr-read ≥Q41 calls when using subsets of the 3.32×108 total read-pairs collected for the study for the HapMap cell lines and clinical samples.

Supplemental Table S9. Oligo sequences.

| **Name** | **Sequence** |
| --- | --- |
| MIP backbone | CTTCAGCTTCCCGATCCGACGGTAGTGTNNNNNNNNNNNN |
| Forward PCR primer | AATGATACGGCGACCACCGAGATCTACACATACGAGATCCGTAATCGGGAAGCTGAAG |
| Reverse PCR primer* | CAAGCAGAAGACGGCATACGAGATXXXXXXXXACACGCACGATCCGACGGTAGTGT |
| Index 1 | CTCTAGCA |
| Index 2 | AGCTCTCA |
| Index 3 | TGAGTGAC |
| Index 4 | ACGCTTAT |
| Index 5 | CAGATAGT |
| Index 6 | GTCACCAT |
| Index 7 | TGGTCGAA |
| Index 8 | GCAATATA |
| Index 9 | CACATGCA |
| Index 10 | TCCTTCGA |
| Index 11 | CTGATGTA |
| Index 12 | CACTGCAA |
| Index 13 | TCGGAGAA |
| Index 14 | CTGAGCTT |
| Index 15 | CTTGGTAC |
| Index 16 | CTGACAAT |
| Index 17 | TGGTACAG |
| Index 18 | GGTCTCAA |
| Index 19 | TGGCTAAT |
| Index 20 | AGAGGATC |
| Index 21 | CGAATACA |
| Index 22 | AGCGTTAC |
| Index 23 | TGACCTCA |
| Index 24 | TAGTTGCC |
| Index 25 | GTTGCAGT |
| Index 26 | ATAGAGGC |
| Index 27 | CTTGACTG |
| Index 28 | AACCTCGA |
| Index 29 | TCAACCGA |
| Index 30 | GCTATGGA |
| Index 31 | TCTTGACC |
| Index 32 | ACATGGAT |
| Index 33 | ATGACAGC |
| Index 34 | AACTCCTG |
| Index 35 | ACTTAAGG |
| Index 36 | TCTTGCAT |
| Index 37 | GACTGTTC |
| Index 38 | ACTGACCT |
| Index 39 | TGTGTCCA |
| Index 40 | CCTGTCAT |
| Index 41 | ATGTACTT |
| Index 42 | GAATAATC |
| Index 43 | CCTTAGAA |
| Index 44 | GAATTCGC |
| Index 45 | CTAGTCCT |
| Index 46 | TCAGAGGT |
| Index 47 | GACATTCT |
| Index 48 | CTAACACG |
| Index 49 | GTGTGATC |
| Index 50 | CTGTTCAC |
| Index 51 | GGTCAGTT |
| Index 52 | AACCGATC |
| Index 53 | CAGCTAAG |
| Read 1 sequencing primer | CATACGAGATCCGTAATCGGGAAGCTGAAG |
| Index sequencing primer | ACACTACCGTCGGATCGTGCGTGT |
| Read 2 sequencing primer | ACACGCACGATCCGACGGTAGTGT |

Sequences of oligos used in MIP design, library construction, and sequencing. Probe sequences available upon request. All oligos, including probes, were procured from IDT using standard purification, with no modifications. *“XXXXXXXX” is replaced with one of 53 index sequences.

Supplemental Note S1. Two layers of indexing in the smMIP strategy.

As is now commonplace, sample index sequences are incorporated at the PCR step so that the capture products of several samples can be sequenced as a single pool. However, we also employed molecular tagging, wherein we modified the common region of each MIP to contain a twelve nt degenerate sequence, such that each capture event is associated with a unique tag sequence. This tag sequence is used to distinguish molecularly distinct capture events at the same locus within the same sample. Fr-reads sharing the same sample index, aligning to the same locus, and sharing the same molecular tag sequence (i.e. tag-defined read groups, TDRGs) are compared to one another to yield a highly accurate single molecule consensus sequence that is expected to be devoid of polymerase and sequencing errors (Figure 1), with the important exception of polymerase errors that occur during the initial gap-fill event. These single molecule consensus reads (smc-reads) are also expected to yield more precise estimates of variant frequency by correcting for non-uniform amplification and ascertainment of different sequences.

Supplemental Note S2. Variation in fraction of aligning reads.

We observed variation in the fraction of reads that aligned, with half of all samples having greater than 80% of fr-reads align to the target and ~80% (44/54) having greater than 60% aligning to target (Supplemental Fig. S1). Across all samples, a very low fraction (<5%) of fr-reads aligned to the reference but not to the target, and the remaining fr-reads were unmapped. This phenomenon was much more prevalent in the clinical samples and corresponded to the presence of a low-molecular weight artifact after PCR, suggesting that low quality and imprecisely quantified input DNA may contribute to artifact formation and reduced mapping rates. Ongoing efforts are directed at reducing the formation of this artifact by altering capture conditions and removing the artifact prior to sequencing via SPRI bead-based size enrichment.

Supplemental Note S3. Coverage distributions.

We further explored the distribution of coverage across the target and the samples sequenced, finding that for 78% (35 of 45) of the clinical samples and all HapMap cell line samples, at least 85% of all targeted coding bases had at least 100× smc-read coverage. Furthermore, for all of the HapMap samples, at least 60% of all targeted coding bases had at least 1,000× smc-read coverage, and 42% (19 of 45) of the clinical samples had at least 50% of targeted coding bases with at least 1,000× smc-read coverage (Figure 2a). Finally, all HapMap samples and 80% (36 of 45) of the clinical samples had at least 97% of targeted coding bases with at least 10× smc-read coverage, while the worst performing sample had 94.5% of targeted coding bases covered with at least 10× smc-read coverage (Figure 2b).

Supplemental Note S4. Rapid workflow characterization.

We subjected the pool of eight clinical samples to a single MiSeq run (152 nt paired-end reads + 8 nt index read). In the absence of a gel-based size-selection, we observed decreased mapping rates compared to the HiSeq data (Supplemental Fig. S11). Nevertheless, we successfully called genotypes at 85-97% of targeted coding bases (requiring ≥10× smc-read coverage), and covered 92-99% of successfully genotyped sites from high-coverage (i.e. HiSeq) data (requiring ≥30× smc-read coverage) (Supplemental Table S7). We observed 100% agreement between rapid workflow (low-coverage) and slow workflow (high-coverage) genotype calls (605,786 calls across the eight samples). These calls included all five previously ascertained clinically informative mutations. However, coverage was insufficient to detect any of the newly discovered low-frequency mutations. Such events may be rendered detectable with the rapid workflow by improvements including the reduction of capture-related artifacts and the increasing throughput of bench-top next-generation sequencing platforms. Finally, we explored the extent to which smc-read coverage and base-call substitution rates were affected by reduced sampling of the high-coverage data, finding that coverage and extremely high quality smc-read base-calls were maintained to only 1% (i.e. ~1.5×107 read-pairs) of the total high-coverage data (Supplemental Fig. S12; Supplemental Table S8).
